# Supplementary material for: Environmental exposures and lymphoma risk: a nested case–control study using the Golden Retriever Lifetime Study cohort
Source: PubMed Central journal article supplement (PMC9287967; doi:10.1186/s40575-022-00122-9), 2022-07-15
Supplement: 40575_2022_122_MOESM1_ESM.pdf [file 40575_2022_122_MOESM1_ESM.pdf]

|                                                | MULTICENTRIC LYMPHOMA ONLY |                 |                    |         | B-CELL LYMPHOMA ONLY |                 |                    |         | T-CELL LYMPHOMA ONLY |                 |                     |         |
|------------------------------------------------|----------------------------|-----------------|--------------------|---------|----------------------|-----------------|--------------------|---------|----------------------|-----------------|---------------------|---------|
|                                                | Cases<br>(n=37)            | Controls (n=74) | OR*                | (95%CI) | Cases<br>(n=19)      | Controls (n=38) | OR                 | (95%CI) | Cases<br>(n=20)      | Controls (n=40) | OR                  | (95%CI) |
|                                                | n (%)                      | n (%)           |                    |         | n (%)                | n (%)           |                    |         | n (%)                | n (%)           |                     |         |
| <b>Chemical plant</b>                          | 8 (21.6%)                  | 9 (12.2%)       | 1.95 (0.69 - 5.48) |         | 1 (5.3%)             | 6 (15.8%)       | 0.33 (0.04 - 2.77) |         | 5 (25.0%)            | 5 (12.5%)       | 2.50 (0.57 - 10.96) |         |
| <b>Municipal dump</b>                          | 8 (21.6%)                  | 14 (18.9%)      | 1.22 (0.42 - 3.52) |         | 4 (21.1%)            | 6 (15.8%)       | 1.44 (0.34 - 6.11) |         | 5 (25.0%)            | 9 (22.5%)       | 1.15 (0.33 - 3.97)  |         |
| <b>Manufacturing plant<sup>^</sup></b>         | 6 (16.2%)                  | 11 (14.9%)      | 1.11 (0.37 - 3.35) |         | 4 (21.1%)            | 7 (18.4%)       | 1.18 (0.30 - 4.63) |         | 5 (25.0%)            | 6 (15.0%)       | 1.77 (0.50 - 6.24)  |         |
| <b>Incineration plant</b>                      | 15 (40.5%)                 | 19 (25.7%)      | 1.96 (0.84 - 4.57) |         | 7 (36.8%)            | 8 (21.1%)       | 2.08 (0.63 - 6.81) |         | 5 (25.0%)            | 10 (25.0%)      | 1.00 (0.30 - 3.32)  |         |
| <b>Railroad embankment track</b>               | 20 (54.1%)                 | 40 (54.1%)      | 1.00 (0.46 - 2.19) |         | 9 (47.4%)            | 23 (60.5%)      | 0.58 (0.18 - 1.83) |         | 12 (60.0%)           | 18 (45.0%)      | 1.82 (0.62 - 5.40)  |         |
| <b>Exposure index (continuous)<sup>#</sup></b> | 1 (0 - 5)                  | 1 (0 - 5)       | 1.23 (0.92 - 1.66) |         | 1 (0 - 5)            | 1 (0 - 4)       | 1.05 (0.70 - 1.57) |         | 1 (0 - 5)            | 1 (0 - 5)       | 1.19 (0.81 - 1.74)  |         |
| <b>3+ exposures (y/n)</b>                      | 12 (32.4%)                 | 12 (16.2%)      | 2.60 (0.99 - 6.86) |         | 6 (31.6%)            | 10 (26.3%)      | 1.31 (0.38 - 4.45) |         | 6 (30.0%)            | 8 (20.0%)       | 1.70 (0.50 - 5.87)  |         |
| <b>Average ozone <math>\geq</math> 70 ppb</b>  | 10 (27.0%)                 | 24 (32.4%)      | 0.74 (0.28 - 1.97) |         | 3 (15.8%)            | 13 (34.2%)      | 0.33 (0.07 - 1.53) |         | 7 (35.0%)            | 17 (42.5%)      | 0.88 (0.27 - 2.81)  |         |
| <b>missing</b>                                 | 8 (21.6%)                  | 15 (20.3%)      | 0.97 (0.36 - 2.59) |         | 5 (26.3%)            | 8 (21.1%)       | 0.85 (0.22 - 3.26) |         | 5 (25.0%)            | 6 (15.0%)       | 1.79 (0.41 - 7.72)  |         |
| <b>Average PM2.5 (continuous)<sup>#</sup></b>  | 8 (5.8 - 14.0)             | 9 (5.7 - 13.8)  | 1.09 (0.83 - 1.44) |         | 8 (5.8 - 10.6)       | 8 (5.9 - 13.8)  | 1.02 (0.60 - 1.75) |         | 9 (6.0 - 11.4)       | 9 (5.7 - 12.8)  | 1.19 (0.81 - 1.74)  |         |
| <b>Secondhand smoke exposure</b>               | 6 (16.2%)                  | 8 (10.8%)       | 1.62 (0.51 - 5.19) |         | 1 (5.3%)             | 3 (7.9%)        | 0.67 (0.07 - 6.41) |         | 2 (10.0%)            | 6 (15.0%)       | 0.63 (0.12 - 3.44)  |         |

<sup>^</sup> manufacturing plant includes rubber, leather or textile manufacturing plants

<sup>#</sup> median (range) shown

\*Exposure frequencies, odds ratios (ORs) and 95% confidence intervals (CIs) are shown
